# Supplementary material for: Tropical cyclone-induced cold wakes in the northeast Indian Ocean
Source: Royal Society of Chemistry journal article supplement (doi:10.1039/d1ea00066g), 2022-01-01
Supplement: d1ea00066g1.pdf [file d1ea00066g1.pdf]

[SUPPLEMENTARY DATA](#)

**Table S1: The amplitude of SST cooling.** Cyclones occurred during the pre-monsoon season for the study period (1982–2020). The superscript symbols represent the region of landfall/track progress, such as <sup>¶</sup> for NE, <sup>Ⓢ</sup> - NW, <sup>Ⓜ</sup> - SE, and <sup>Ⓢ</sup> - SW. The bold ink indicates the cyclones that are mentioned in the results and discussion section.

| Sl. No | Name of the Cyclone       | Category | Selected 1°x1° box with maximum cooling | SST before cyclone (°C) |       |       | Minimum SST observed (°C) |       |       | SST Difference (°C) |       |
|--------|---------------------------|----------|-----------------------------------------|-------------------------|-------|-------|---------------------------|-------|-------|---------------------|-------|
|        |                           |          |                                         | Date                    | AVHRR | OISST | Date                      | AVHRR | OISST | AVHRR               | OISST |
| 1      | BoB01 (1982) <sup>¶</sup> | 4        | 89.2-90.2°E<br>16.8-17.8°N              | 27 Apr                  | 27.69 | -     | 5 May                     | 25.79 | -     | 1.9                 | -     |
| 2      | BoB02 (1982) <sup>Ⓢ</sup> | 2        | 87.8-88.8 °E<br>18.2-19.2°N             | 27 May                  | 31.44 | -     | 4 Jun                     | 26.63 | -     | 4.81                | -     |
| 3      | BoB01 (1985) <sup>¶</sup> | TS       | 88-90°E<br>18.8-19.8°N                  | 19 May                  | 29.19 | -     | 29 May                    | 27.48 | -     | 1.71                | -     |
| 4      | BoB02 (1987) <sup>¶</sup> | TS       | 89.3-90.3°E<br>15.4-16.4°N              | 27 May                  | 29.35 | -     | 9 Jun                     | 28.35 | -     | 1                   | -     |
| 5      | BoB01 (1989) <sup>Ⓢ</sup> | TS       | 91.7-92.7°E<br>13.2-14.2°N              | 20 May                  | 30.58 | -     | 28 May                    | 29.17 | -     | 1.41                | -     |
| 6      | BoB02 (1990) <sup>Ⓢ</sup> | 4        | 81.3-82.3°E<br>10.6-11.6°N              | 30 Apr                  | 29.85 | -     | 13 May                    | 27.58 | -     | 2.27                | -     |
| 7      | BoB02 (1991) <sup>¶</sup> | 5        | 88.2-89.2°E<br>13.8-14.8°N              | 19 Apr                  | 29.57 | -     | 1 May                     | 26.19 | -     | 3.38                | -     |
| 8      | BoB03 (1991) <sup>¶</sup> | TS       | 88.8-89.8°E<br>15-16°N                  | 27 May                  | 30.17 | -     | 4 Jun                     | 29.35 | -     | 0.82                | -     |
| 9      | BoB01 (1992) <sup>¶</sup> | 1        | 87.9-88.9°E<br>10.8-11.8°N              | 12 May                  | 30.37 | -     | 23 May                    | 27.61 | -     | 2.76                | -     |
| 10     | BoB01 (1994) <sup>Ⓢ</sup> | TS       | 89-90°E<br>10.5-11.5°N                  | 15 Mar                  | 28.20 | -     | 24 Mar                    | 26.53 | -     | 1.67                | -     |
| 11     | BoB02 (1994) <sup>¶</sup> | 4        | 90.6-91.6°E<br>17.2-18.2°N              | 23 Apr                  | 28.96 | -     | 4 May                     | 27.15 | -     | 1.81                | -     |
| 12     | BoB01 (1996) <sup>¶</sup> | TS       | 87.1-88.1°E<br>19.5-20.5°N              | 28 Apr                  | 28.02 | -     | 8 May                     | 26.89 | -     | 1.13                | -     |
| 13     | BoB01(1997) <sup>¶</sup>  | 4        | 88.8-89.8°E<br>17.2-18.2°N              | 12 May                  | 29.29 | -     | 20 May                    | 26.98 | -     | 2.30                | -     |
| 14     | BoB01(1998) <sup>¶</sup>  | 1        | 88.7-89.7°E                             | 14 May                  | 30.34 | 30.12 | 19 May                    | 29.30 | 29.19 | 1.03                | 0.93  |

|           |                        |          |                                    |               |              |              |               |              |              |             |             |
|-----------|------------------------|----------|------------------------------------|---------------|--------------|--------------|---------------|--------------|--------------|-------------|-------------|
|           |                        |          | 13-14°N                            |               |              |              |               |              |              |             |             |
| 15        | BoB01(2000) ¶          | TS       | 89.2-90.2°E<br>13.3-14.3°N         | 24 Apr        | 28.68        | 29.63        | 30 Apr        | 26.93        | 28.64        | 1.75        | 0.99        |
| 16        | BoB01(2003) ¶          | 1        | 87-88°E<br>8.5-9.5°N               | 7 May         | 30.16        | 30.77        | 19 May        | 27.33        | 27.68        | 2.82        | 3.09        |
| 17        | BoB01(2004) ¶          | 1        | 91-92°E<br>17.8-18.8°N             | 13 May        | 28.27        | 30.41        | 21 May        | 27.48        | 27.13        | 0.79        | 3.28        |
| 18        | Mala (2006) ¶          | 2        | 86-87°E<br>7.8-8.8°N               | 22 Apr        | 29.41        | 30.88        | 29 Apr        | 27.85        | 29.54        | 1.55        | 1.34        |
| 19        | Akash (2007) ¶         | 1        | 89.8-90.8°E<br>15.7-16.7°N         | 10 May        | 29.70        | 30.19        | 14 May        | 27.53        | 28.00        | 2.16        | 2.19        |
| <b>20</b> | <b>Nargis (2008) ¶</b> | <b>4</b> | <b>85.8-86.8°E<br/>14.2-15.2°N</b> | <b>24 Apr</b> | <b>30.38</b> | <b>30.17</b> | <b>1 May</b>  | <b>28.04</b> | <b>27.66</b> | <b>2.33</b> | <b>2.51</b> |
| 21        | Bijli (2009) ¶         | TS       | 90.5-91.5°E<br>19.5-20.5°N         | 11 Apr        | 29.17        | 29.75        | 17 Apr        | 27.73        | 28.60        | 1.43        | 1.15        |
| <b>22</b> | <b>Aila (2009) ¶</b>   | <b>1</b> | <b>86.7-88.7°E<br/>19.6-20.6°N</b> | <b>20 May</b> | <b>30.1</b>  | <b>30.21</b> | <b>25 May</b> | <b>28.06</b> | <b>27.88</b> | <b>2.03</b> | <b>2.33</b> |
| <b>23</b> | <b>Laila (2010) ¥</b>  | <b>1</b> | <b>83-84°E<br/>12.8-13.8°N</b>     | <b>14 May</b> | <b>30.90</b> | <b>31.03</b> | <b>21 May</b> | <b>29.55</b> | <b>29.09</b> | <b>1.35</b> | <b>1.94</b> |
| 24        | Roanu(2016) ¶          | TS       | 83.4-84.4°E<br>11.2-12.2°N         | 14 May        | 31.92        | 31.87        | 23 May        | 28.94        | 30.29        | 2.98        | 1.58        |
| 25        | Viyaru (2013) ¶        | TS       | 86.3-87.3°E<br>13.5-14.5°N         | 7 May         | 30.51        | 30.75        | 16 May        | 28.98        | 28.48        | 1.53        | 2.27        |
| 26        | Maarutha (2017) ¶      | TS       | 91.6-92.6°E<br>16-17°N             | 12 Apr        | 29.11        | 29.83        | 18 Apr        | 27.69        | 27.86        | 1.41        | 1.97        |
| 27        | Mora (2017) ¶          | 1        | 89.5-90.5°E<br>18.5-19.5°N         | 25 May        | 30.92        | 31.64        | 31 May        | 29.12        | 28.61        | 1.79        | 3.03        |
| 28        | Fani (2019) ¶          | 5        | 83.8-84.8°E<br>12.4-13.4°N         | 22 Apr        | 30.40        | 30.30        | 3 May         | 27.22        | 27.60        | 3.18        | 2.7         |
| 29        | Amphan(2020) ¶         | 5        | 86.8-87.8°E<br>14-15°N             | 12 May        | 31.50        | 31.26        | 20 May        | 27.13        | 26.60        | 4.37        | 4.66        |

**Table S2: The SST cooling by post-monsoon cyclones in the bay.** Cyclones during the post-monsoon season for the study period (1982–2020). The superscript symbols represent the region of landfall or track progress, such as <sup>¶</sup> for NE, <sup>Ⓜ</sup> - NW, <sup>Ⓢ</sup> - SE, and <sup>Ⓨ</sup> - SW. The bold red colour indicates the cyclones showing cooling less than 0.5°C.

| Sl No | Name of the Cyclone       | Category | Selected 1°x1° box with maximum cooling | SST before cyclone (°C) |       |       | SST after Cyclone (°C) |       |       | SST Difference (°C) |       |
|-------|---------------------------|----------|-----------------------------------------|-------------------------|-------|-------|------------------------|-------|-------|---------------------|-------|
|       |                           |          |                                         | Date                    | AVHRR | OISST | Date                   | AVHRR | OISST | AVHRR               | OISST |
| 1     | BoB03(1982) <sup>Ⓜ</sup>  | TS       | 85.8-86.8°E<br>12.4-13.4°N              | 10 Oct                  | 29.33 | -     | 15 Oct                 | 27.66 | -     | 1.67                | -     |
| 2     | BoB04 (1982) <sup>Ⓨ</sup> | TS       | 87.1-88.1°E<br>10.4-11.4°N              | 14 Oct                  | 29.02 | -     | 21 Oct                 | 27.47 | -     | 1.55                | -     |
| 3     | BoB02(1983) <sup>Ⓜ</sup>  | TS       | 85-86°E<br>15-16°N                      | 29 Sep                  | 28.27 | -     | 3 Oct                  | 26.9  | -     | 1.36                | -     |
| 4     | BoB04 (1983) <sup>¶</sup> | TS       | 87.6-88.6°E<br>15.6-16.6°N              | 2 Nov                   | 29.23 | -     | 10 Nov                 | 25.77 | -     | 3.46                | -     |
| 5     | BoB02 (1984) <sup>Ⓜ</sup> | TS       | 88-89°E<br>18.6-19.6°N                  | 7 Oct                   | 29.95 | -     | 13 Oct                 | 28.11 | -     | 1.84                | -     |
| 6     | BoB03 (1984) <sup>Ⓨ</sup> | 2        | 83-84°E<br>9.2-10.2°N                   | 6 Nov                   | 28.99 | -     | 13 Nov                 | 26.92 | -     | 2.09                | -     |
| 7     | BoB04 (1984) <sup>Ⓨ</sup> | 1        | 85.2-86.2°E<br>9.2-10.2°N               | 24 Nov                  | 28.75 | -     | 3 Dec                  | 25.81 | -     | 2.94                | -     |
| 8     | BoB03 (1985) <sup>Ⓜ</sup> | TS       | 88.4-89.4°E<br>14-15°N                  | 5 Oct                   | 28.29 | -     | 13 Oct                 | 27.86 | -     | <b>0.43</b>         | -     |
| 9     | BoB04 (1985) <sup>Ⓜ</sup> | TS       | 88-89°E<br>19-20°N                      | 12 Oct                  | 28.53 | -     | 17 Oct                 | 28.08 | -     | <b>0.45</b>         | -     |
| 10    | BoB05 (1985) <sup>Ⓨ</sup> | TS       | 83.6-84.6°E<br>12.2-13.2°N              | 10 Nov                  | 27.64 | -     | 16 Nov                 | 26.47 | -     | 1.17                | -     |
| 11    | BoB06 (1985) <sup>Ⓨ</sup> | TS       | 80.8-81.8°E<br>12.4-13.4°N              | 6 Dec                   | 26.69 | -     | 13 Dec                 | 25.01 | -     | 1.68                | -     |
| 12    | BoB02 (1986) <sup>¶</sup> | TS       | 87-88°E<br>15-16°N                      | 3 Nov                   | 28.28 | -     | 11 Nov                 | 26.80 | -     | 1.48                | -     |
| 13    | BoB04 (1987) <sup>Ⓨ</sup> | TS       | 87.2-88.2°E<br>11.4-12.4°N              | 11 Oct                  | 28.76 | -     | 15 Oct                 | 27.24 | -     | 1.52                | -     |
| 14    | BoB05 (1987) <sup>Ⓨ</sup> | TS       | 87-88°E<br>8-9°N                        | 27 Oct                  | 28.80 | -     | 1 Nov                  | 28.44 | -     | <b>0.36</b>         | -     |
| 15    | BoB06 (1987) <sup>Ⓨ</sup> | TS       | 93.6-94.6°E<br>11.6-12.6                | 5 Nov                   | 29.01 | -     | 13 Nov                 | 27.59 | -     | 1.42                | -     |
| 16    | BoB07 (1987) <sup>Ⓨ</sup> | TS       | 82.8-83.8°E<br>10.8-11.8                | 29 Nov                  | 28.88 | -     | 4 Dec                  | 27.37 | -     | 1.51                | -     |
| 17    | BoB08 (1987) <sup>Ⓨ</sup> | TS       | 81.8-82.8°E<br>13.8-14.8°N              | 14 Dec                  | 27.95 | -     | 23 Dec                 | 26.59 | -     | 1.36                | -     |
| 18    | BoB02 (1988) <sup>Ⓜ</sup> | TS       | 92.2-93.2°E<br>15.4-16.4                | 14 Oct                  | 28.11 | -     | 20 Oct                 | 27.50 | -     | 0.61                | -     |
| 19    | BoB03 (1988) <sup>¶</sup> | TS       | 89.5-90.5°E<br>17.4-18.4°N              | 11 Nov                  | 28.56 | -     | 17 Nov                 | 27.11 | -     | 1.45                | -     |

|    |                |    |                            |        |       |       |        |       |       |      |      |
|----|----------------|----|----------------------------|--------|-------|-------|--------|-------|-------|------|------|
| 20 | BoB04 (1988) ¶ | 3  | 88.5-89.5°E<br>12.4-13.4°N | 18 Nov | 28.25 | -     | 30 Nov | 25.97 | -     | 2.28 | -    |
| 21 | BoB05(1988) €  | TS | 90-91°E<br>11.4-12.4°N     | 3 Dec  | 26.42 | -     | 8 Dec  | 25.63 | -     | 0.79 | -    |
| 22 | BoB04 (1990) ¶ | TS | 85.2-86.2°E<br>9.7-10.7°N  | 10 Dec | 28.22 | -     | 17 Dec | 26.83 | -     | 1.39 | -    |
| 23 | BoB04 (1991) ¥ | TS | 85-86°E<br>12-13°N         | 6 Nov  | 29.24 | -     | 16 Nov | 27.87 | -     | 1.37 | -    |
| 24 | BoB07 (1992) ϕ | TS | 89.9-90.9°E<br>9.7-10.7°N  | 3 Oct  | 29.09 | -     | 9 Oct  | 26.64 | -     | 1.45 | -    |
| 25 | BoB09 (1992) ¥ | TS | 86-87°E<br>15.6-16.6°N     | 29 Oct | 28.66 | -     | 6 Nov  | 26.86 | -     | 1.8  | -    |
| 26 | BoB10 (1992) ¥ | 1  | 87-88°E<br>6.2-7.2°N       | 3 Nov  | 27.65 | -     | 9 Nov  | 27.23 | -     | 0.42 | -    |
| 27 | BoB02 (1993) ¥ | 1  | 83.8-84.8°E<br>8.4-9.4°N   | 24 Nov | 27.88 | -     | 1 Dec  | 27.35 | -     | 0.53 | -    |
| 28 | BoB04 (1994) ¥ | TS | 83.4-84.4°E<br>12.2-13.2°N | 25 Oct | 28.82 | -     | 31 Oct | 27.50 | -     | 1.32 | -    |
| 29 | BoB03 (1995) ϕ | 1  | 93-94°E<br>10.6-11.6°N     | 2 Nov  | 28.80 | -     | 12 Nov | 27.05 | -     | 1.75 | -    |
| 30 | BoB04 (1995) ¶ | 3  | 84.9-85.9°E<br>11.6-12.6°N | 15 Nov | 29.24 | -     | 25 Nov | 27.09 | -     | 2.15 | -    |
| 31 | BoB06 (1996) ¶ | TS | 86.4-87.4°E<br>13.5-14.5°N | 18 Oct | 27.72 | -     | 29 Oct | 27.30 | -     | 0.42 | -    |
| 32 | BoB07 (1996) ϕ | 4  | 87.2-88.2°E<br>15.2-16.2°N | 28 Oct | 27.75 | -     | 5 Nov  | 26.88 | -     | 0.87 | -    |
| 33 | BoB08 (1996) ¥ | 1  | 82.6-83.6°E<br>14.2-15.2°N | 23 Nov | 27.72 | -     | 5 Dec  | 25.92 | -     | 1.8  | -    |
| 34 | BoB08 (1997) € | 1  | 93-94°E<br>15.4-16.4°N     | 1 Nov  | 28.91 | -     | 11 Nov | 27.35 | -     | 1.55 | -    |
| 35 | BoB05 (1998) ¥ | 2  | 85.2-86.2°E<br>12.2-13.2°N | 10 Nov | 28.78 | 28.16 | 15 Nov | 27.90 | 27.95 | 0.87 | 0.21 |
| 36 | BoB06 (1998) ϕ | 1  | 87-88°E<br>15.4-16.4°N     | 16 Nov | 29.44 | 28.01 | 22 Nov | 27.24 | 27.88 | 2.20 | 0.13 |
| 37 | BoB05 (1999) ϕ | 4  | 85.5-86.5°E<br>17.5-18.5°N | 12 Oct | 29.99 | 29.25 | 18 Oct | 28.61 | 27.07 | 1.37 | 2.18 |
| 38 | BoB06 (1999) ϕ | 5  | 88.2-89.2°E<br>18-19°N     | 22 Oct | 28.25 | 28.80 | 31 Oct | 27.02 | 27.16 | 1.23 | 1.64 |
| 39 | BoB03 (2000) ¥ | TS | 83-84°E<br>14-15°N         | 12 Oct | 29.63 | 29.14 | 20 Oct | 28.65 | 27.99 | 0.98 | 1.16 |
| 40 | BoB04 (2000) ϕ | TS | 88-89°E<br>20-21°N         | 22 Oct | 29.28 | 29.36 | 29 Oct | 27.54 | 28.51 | 1.74 | 0.84 |
| 41 | BoB05 (2000) ¥ | 1  | 81.4-82.4°E<br>11.6-12.6°N | 23 Nov | 28.02 | 28.31 | 30 Nov | 27.16 | 27.40 | 0.85 | 0.91 |

|    |                   |    |                            |        |       |       |        |       |       |             |             |
|----|-------------------|----|----------------------------|--------|-------|-------|--------|-------|-------|-------------|-------------|
| 42 | BoB06 (2000) ¥    | 1  | 84-85°E<br>8-9°N           | 20 Dec | 27.70 | 27.10 | 30 Dec | 26.72 | 26.55 | 0.98        | 0.56        |
| 43 | BoB01(2001) ¥     | TS | 82.5-83.5°E<br>15-16°N     | 1 Oct  | 29.25 | 27.81 | 16 Oct | 28.34 | 27.58 | 0.90        | <b>0.23</b> |
| 44 | BoB03 (2002) ¥    | TS | 87-88°E<br>19.6-20.6°N     | 6 Nov  | 28.00 | 28.14 | 12 Nov | 27.28 | 27.89 | 0.71        | <b>0.25</b> |
| 45 | BoB04 (2002) ₺    | TS | 88-89°E<br>14.5-15.5°N     | 20 Nov | 27.65 | 28.74 | 27 Nov | 26.79 | 27.88 | 0.85        | 0.87        |
| 46 | BoB05 (2002) ¥    | TS | 82.2-83.2°E<br>5-6°N       | 18 Dec | 27.76 | 28.70 | 24 Dec | 27.38 | 28.49 | <b>0.38</b> | <b>0.21</b> |
| 47 | BoB07 (2003) ¥    | TS | 80.7-81.7°E<br>12.5-13.5°N | 11 Dec | 27.17 | 28.02 | 15 Dec | 25.92 | 27.20 | 1.25        | 0.82        |
| 48 | Baaz (2005) ¥     | TS | 84-85°E<br>11.7-12.7°N     | 25 Nov | 28.21 | 27.82 | 1 Dec  | 26.49 | 27.02 | 1.71        | 0.80        |
| 49 | Fanoos (2005) ¥   | TS | 79.7-80.7°E<br>9.5-10.5°N  | 3 Dec  | 27.32 | 28.24 | 11 Dec | 26.35 | 26.67 | 0.96        | 1.57        |
| 50 | Ogni (2006) ¥     | TS | 80-81°E<br>10-11°N         | 26 Oct | 27.98 | 29.28 | 30 Oct | 26.79 | 28.99 | <b>0.19</b> | <b>0.29</b> |
| 51 | Sidr (2007) ¶     | 4  | 89.6-90.6°E<br>11.7-12.7°N | 8 Nov  | 28.91 | 28.70 | 16 Nov | 27.45 | 26.46 | 1.45        | 2.23        |
| 52 | Rashmi (2008) ϕ   | TS | 86.8-87.8°E<br>16.8-17.8°N | 22 Oct | 29.39 | 29.34 | 28 Oct | 28.22 | 27.42 | 1.16        | 1.92        |
| 53 | Khaimukh (2008) ¥ | TS | 84.5-85.5°E<br>14.4-15.4°N | 10 Nov | 28.40 | 29.02 | 17 Nov | 28.10 | 27.61 | <b>0.29</b> | 1.40        |
| 54 | Nisha (2008) ¥    | TS | 79-80°E<br>9.2-10.2°N      | 22 Nov | 28.21 | 28.79 | 27 Nov | 27.10 | 28.03 | 1.10        | 0.76        |
| 55 | Ward (2009) ¥     | TS | 81.6-82.6°E<br>6.6-7.6°N   | 7 Dec  | 28.02 | 28.67 | 12 Dec | 27.13 | 27.65 | 0.89        | 1.02        |
| 56 | Giri (2010) ¶     | 4  | 90-91°E<br>18.5-19.5°N     | 17 Oct | 29.54 | 28.52 | 22 Oct | 28.72 | 28.15 | 0.82        | 0.37        |
| 57 | Jal (2010) ¥      | 1  | 84-85°E<br>12-13°N         | 1 Nov  | 29.17 | 29.11 | 7 Nov  | 28.08 | 27.12 | 1.09        | 1.99        |
| 58 | Thane (2010) ¥    | 1  | 83-84°E<br>11.5-12.5°N     | 22 Dec | 28.53 | 27.62 | 29 Dec | 27.07 | 26.16 | 1.45        | 1.47        |
| 59 | Nilam (2010) ¥    | TS | 82.3-83.3°E<br>12-13°N     | 25 Oct | 28.90 | 28.85 | 3 Nov  | 28.46 | 26.58 | <b>0.44</b> | 2.26        |
| 60 | Phailin (2013) ϕ  | 5  | 86-87°E<br>17.6-18.6°N     | 5 Oct  | 29.17 | 29.52 | 12 Oct | 26.91 | 24.63 | 2.25        | 4.89        |
| 61 | Helen (2013) ϕ    | 1  | 83.4-84.4°E<br>15.6-16.6°N | 16 Nov | 27.14 | 27.11 | 24 Nov | 26.64 | 26.33 | 0.50        | 0.79        |
| 62 | Lehar (2013) ¥    | 1  | 92.5-93.5°E<br>13.4-14.4°N | 16 Nov | 28.58 | 28.78 | 26 Nov | 27.91 | 27.96 | 0.67        | 0.82        |
| 63 | Madi (2013) ¥     | 2  | 84.6-85.6°E<br>13.5-14.5°N | 3 Dec  | 27.81 | 27.76 | 13 Dec | 25.23 | 25.64 | 2.57        | 2.12        |

|    |                  |    |                            |        |       |       |        |       |       |             |             |
|----|------------------|----|----------------------------|--------|-------|-------|--------|-------|-------|-------------|-------------|
| 64 | Hudhud (2013) φ  | 4  | 85-86°E<br>15.8-16.8°N     | 4 Oct  | 29.51 | 30.08 | 10 Oct | 26.52 | 23.56 | 2.99        | 6.52        |
| 65 | Kyant (2016) φ   | TS | 85.6-86.6°E<br>14.5-15.5°N | 18 Oct | 28.61 | 29.41 | 24 Oct | 28.18 | 28.61 | <b>0.43</b> | 0.8         |
| 66 | Nada (2016) ¥    | TS | 81.5-82.5°E<br>10-11°N     | 26 Nov | 28.04 | 28.13 | 2 Dec  | 27.34 | 27.70 | 0.70        | <b>0.43</b> |
| 67 | Vardah (2016) ¥  | 1  | 81.6-82.6°E<br>12.8-13.8°N | 3 Dec  | 28.07 | 28.37 | 11 Dec | 26.59 | 26.73 | 1.48        | 1.64        |
| 68 | Titli (2018) φ   | 3  | 86.6-87.6°E<br>16-17°N     | 5 Oct  | 30.70 | 30.33 | 10 Oct | 27.42 | 24.71 | 3.28        | 5.62        |
| 69 | Gaja (2018) ¥    | 1  | 80.8-81.8°E<br>10.5-11.5°N | 7 Nov  | 28.58 | 29.02 | 16 Nov | 27.42 | 27.93 | 1.15        | 1.09        |
| 70 | Phethai (2018) φ | TS | 82.5-83.5°E<br>10.8-11.8°N | 10 Dec | 28.25 | 27.18 | 19 Dec | 27.52 | 26.70 | 0.72        | <b>0.48</b> |
| 71 | Bulbul(2019) ¶   | 1  | 87.5-88.5°E<br>18-19°N     | 2 Nov  | 29.16 | 29.62 | 11 Nov | 26.52 | 26.60 | 2.64        | 3.02        |
| 72 | Nivar(2020) ¥    | 1  | 83-84°E<br>10.6-11.6°N     | 19 Nov | 29.18 | 29.39 | 27 Nov | 27.62 | 27.55 | 1.56        | 1.84        |
| 73 | Burevi (2020) ¥  | TS | 86-87°E<br>6.5-75°N        | 26 Nov | 29.27 | 28.98 | 3 Dec  | 28.30 | 28.75 | 0.97        | 0.23        |

**Table S3: The parameters that influence SST cooling.** Cyclones during the pre-monsoon and post-monsoon season for the study period (1982-2020). The cyclones that occurred in El Niño years are shown in red, La Niña in blue and Normal years in black ink.

| Sl.No | Name of cyclone | SST Cooling AVHRR | T-speed (m/s) | EPV (10 <sup>-4</sup> m/s) | MLD (m) | Heat Flux (W/m <sup>2</sup> ) | Tau (N/m <sup>2</sup> ) | Maximum Sustained wind speed (m/s) | Lifetime (days) | Recovery time of SST (days) |
|-------|-----------------|-------------------|---------------|----------------------------|---------|-------------------------------|-------------------------|------------------------------------|-----------------|-----------------------------|
| 1     | BoB01 (1982)    | 1.9               | 4.33          | 0.97                       | -       | -41.4                         | 0.15                    | 61.72                              | 6               | 6                           |
| 2     | BoB02 (1982)    | 4.81              | 2.52          | 1.17                       | -       | -87.4                         | 0.20                    | 28.29                              | 6               | 8                           |
| 3     | BoB01 (1985)    | 1.71              | 3.59          | 0.81                       | -       | 22.0                          | 0.44                    | 30.86                              | 4               | 6                           |
| 4     | BoB02 (1987)    | 1                 | 5.77          | 0.50                       | -       | -4.9                          | 0.19                    | 28.29                              | 9               | 11                          |
| 5     | BoB01 (1989)    | 1.41              | 5.03          | 3.63                       | -       | 33.7                          | 0.37                    | 28.29                              | 5               | 7                           |
| 6     | BoB02 (1990)    | 2.27              | 5.65          | 3.18                       | -       | 11.9                          | 0.67                    | 64.3                               | 9               | 10                          |
| 7     | BoB02 (1991)    | 3.38              | 7.46          | 3.36                       | -       | -5.4                          | 0.39                    | 72.01                              | 9               | 12                          |
| 8     | BoB03 (1991)    | 0.82              | 3.43          | 0.35                       | -       | -180.5                        | 0.29                    | 25.72                              | 5               | 5                           |
| 9     | BoB01 (1992)    | 2.76              | 7.6           | 0.70                       |         | -187.8                        | 0.26                    | 33.43                              | 6               | 7                           |
| 10    | BoB01 (1994)    | 1.67              | 2.79          | 1.34                       | 11.13   | -82.2                         | 0.11                    | 20.57                              | 8               | 8                           |
| 11    | BoB02 (1994)    | 1.81              | 4.28          | 1.20                       | 14.1    | 191.6                         | 0.33                    | 64.3                               | 8               | 10                          |
| 12    | BoB01 (1996)    | 1.13              | 5.43          | 0.75                       | 17.72   | 43.0                          | 0.10                    | 20.57                              | 8               | 13                          |
| 13    | BoB01 (1997)    | 2.3               | 3.54          | 4.00                       | 11.11   | -451.3                        | 0.54                    | 51.4                               | 5               | 7                           |
| 14    | BoB01 (1998)    | 1.04              | 5.82          | 1.47                       | 20.66   | -227.4                        | 0.41                    | 31.29                              | 4               | 8                           |
| 15    | BoB01 (2000)    | 1.75              | 6.48          | 0.24                       | 22.3    | -146.2                        | 0.19                    | 18                                 | 4               | 7                           |
| 16    | BoB01 (2003)    | 2.83              | 3.09          | 2.27                       | 19.71   | -372.1                        | 0.53                    | 29.05                              | 6               | 15                          |
| 17    | BoB01 (2004)    | 0.79              | 6.24          | 1.16                       | 10.49   | -219.3                        | 0.23                    | 29.05                              | 6               | 9                           |
| 18    | Mala (2006)     | 1.5595            | 4.34          | 2.89                       | 10.64   | -280.1                        | 0.32                    | 51.4                               | 5               | 12                          |
| 19    | Akash (2007)    | 2.1696            | 5.99          | 1.10                       | 10.54   | -249.6                        | 0.49                    | 29.05                              | 3               | 11                          |
| 20    | Nargis (2008)   | 2.3365            | 1.77          | 3.08                       | 10.57   | -250.0                        | 0.34                    | 51.4                               | 7               | 13                          |
| 21    | Bijli (2009)    | 1.4325            | 4.39          | 0.72                       | 12.36   | -99.7                         | 0.18                    | 22.35                              | 4               | 8                           |
| 22    | Aila (2009)     | 2.0346            | 3.43          | 2.08                       | 11.91   | -256.4                        | 0.53                    | 29.05                              | 4               | 6                           |



|    |                |        |      |        |       |        |        |       |    |    |
|----|----------------|--------|------|--------|-------|--------|--------|-------|----|----|
| 23 | Laila (2010)   | 1.3508 | 3.63 | 3.49   | 31.3  | -219.6 | 0.40   | 29.05 | 7  | 14 |
| 24 | Viyaru (2013)  | 1.5305 | 7.34 | 2.27   | 16.18 | -272.3 | 0.39   | 22.35 | 8  | 15 |
| 25 | Roanu (2016)   | 2.98   | 6.84 | 0.89   | 11.55 | -207.7 | 0.83   | 30.86 | 6  | 10 |
| 26 | Maarutha(2017) | 1.41   | 7.23 | 0.85   | 10.72 | -225.5 | 0.31   | 20.11 | 2  | 10 |
| 27 | Mora (2017)    | 1.79   | 5.48 | 1.35   | 10.53 | -320.4 | 0.36   | 29.05 | 4  | 8  |
| 28 | Fani (2019)    | 3.18   | 5.11 | 5.68   | 12.23 | -      | -      | 77.16 | 10 | 15 |
| 29 | Amphan (2020)  | 4.37   | 2.51 | 4.96   | 17.24 | -      | -      | 74.58 | 7  | 13 |
| 30 | BoB03 (1982)   | 1.67   | 4.53 | 0.274  | -     | -106.8 | 0.1202 | 25.72 | 4  | 5  |
| 31 | BoB04 (1982)   | 1.55   | 3.27 | 0.538  | -     | -104.6 | 0.1867 | 25.72 | 3  | 3  |
| 32 | BoB02 (1983)   | 1.36   | 4.52 | 1.246  | -     | -96.78 | 0.222  | 25.72 | 4  | 6  |
| 33 | BoB04 (1983)   | 3.46   | 3.54 | 0.5696 | -     | -226.4 | 0.2743 | 28.29 | 5  | 8  |
| 34 | BoB02 (1984)   | 1.84   | 3.11 | 0.6774 | -     | -123.5 | 0.2186 | 23.14 | 5  | 7  |
| 35 | BoB03 (1984)   | 2.09   | 1.85 | 2.605  | -     | -145.1 | 0.1502 | 43.72 | 7  | 7  |
| 36 | BoB04 (1984)   | 2.94   | 4.08 | 1.288  | -     | 143.3  | 0.4498 | 38.58 | 12 | 14 |
| 37 | BoB03 (1985)   | 0.43   | 3.72 | 0.8466 | -     | 137.2  | 0.1685 | 25.72 | 4  | 5  |
| 38 | BoB04 (1985)   | 0.45   | 4.36 | 1.07   | -     | 11.78  | 0.1711 | 25.72 | 2  | 2  |
| 39 | BoB05 (1985)   | 1.17   | 5.07 | 0.594  | -     | 24.16  | 0.1617 | 28.29 | 6  | 8  |
| 40 | BoB06 (1985)   | 1.68   | 4.99 | 0.884  | -     | 38.61  | 0.1993 | 25.72 | 6  | 9  |
| 41 | BoB02 (1986)   | 1.48   | 8.2  | 0.549  | -     | -2.571 | 0.1816 | 25.72 | 7  | 9  |
| 42 | BoB04 (1987)   | 1.52   | 3.61 | 0.639  | -     | 33.01  | 0.1198 | 23.14 | 3  | 5  |
| 43 | BoB05 (1987)   | 0.35   | 4.18 | 1.54   | -     | 38.41  | 0.2766 | 28.29 | 5  | 7  |
| 44 | BoB06 (1987)   | 1.42   | 5.15 | 1.045  | -     | -31.34 | 0.3322 | 25.72 | 6  | 8  |
| 45 | BoB07 (1987)   | 1.51   | 4.02 | 0.29   | -     | -4.604 | 0.0992 | 23.14 | 11 | 15 |
| 46 | BoB08 (1987)   | 1.36   | 7.39 | 0.8408 | -     | 55.89  | 0.2433 | 18    | 7  | 8  |
| 47 | BoB02 (1988)   | 0.60   | 5.5  | 0.622  | -     | 71.05  | 0.0763 | 18    | 3  | 5  |
| 48 | BoB03 (1988)   | 1.45   | 2.78 | 1.482  | -     | 26.33  | 0.5621 | 28.29 | 5  | 7  |

|    |              |        |      |        |       |        |        |       |    |    |
|----|--------------|--------|------|--------|-------|--------|--------|-------|----|----|
| 49 | BoB04 (1988) | 2.28   | 7.17 | 3.053  | -     | -61.05 | 0.3912 | 56.58 | 10 | 12 |
| 50 | BoB05 (1988) | 0.79   | 4.78 | 0.9787 | -     | -7.767 | 0.1217 | 23.14 | 7  | 11 |
| 51 | BoB04 (1990) | 1.39   | 3.72 | 0.9497 | -     | 23.62  | 0.4108 | 23.14 | 7  | 9  |
| 52 | BoB04 (1991) | 1.37   | 6.59 | 0.7017 | -     | -9.34  | 0.3534 | 20.57 | 8  | 10 |
| 53 | BoB07 (1992) | 1.45   | 7.78 | 0.3674 | -     | 0.9178 | 0.1668 | 23.14 | 6  | 8  |
| 54 | BoB09 (1992) | 1.8    | 2.8  | 0.3434 | -     | -131.8 | 0.1924 | 28.29 | 9  | 10 |
| 55 | BoB10 (1992) | 0.419  | 2.91 | 0.6343 | -     | -230.6 | 0.2513 | 36    | 12 | 13 |
| 56 | BoB02 (1993) | 0.529  | 5.61 | 1.413  | 12.78 | 58.91  | 0.2432 | 38.58 | 9  | 12 |
| 57 | BoB04 (1994) | 1.32   | 4.61 | 0.3108 | 13.64 | -82.61 | 0.1677 | 23.14 | 4  | 6  |
| 58 | BoB03 (1995) | 1.75   | 5.33 | 0.9766 | 13.25 | -133.2 | 0.4607 | 36    | 6  | 7  |
| 59 | BoB04 (1995) | 2.15   | 7.22 | 1.115  | 10.58 | -184.3 | 0.8894 | 54.01 | 8  | 9  |
| 60 | BoB06 (1996) | 0.419  | 5.72 | 1.042  | 14.9  | 21.76  | 0.2545 | 23.14 | 9  | 12 |
| 61 | BoB07 (1996) | 0.870  | 6.15 | 0.54   | 15.7  | 8.696  | 0.1027 | 59.15 | 7  | 8  |
| 62 | BoB08 (1996) | 1.8    | 4.83 | 3.662  | 20.78 | -16.3  | 0.1876 | 38.58 | 12 | 15 |
| 63 | BoB08 (1997) | 1.5547 | 2.16 | 1.52   | 9.231 | -374.8 | 0.5    | 15.64 | 6  | 8  |
| 64 | BoB05 (1998) | 0.878  | 7.65 | 0.94   | 14.67 | -265.7 | 0.25   | 37.99 | 4  | 8  |
| 65 | BoB06 (1998) | 2.2031 | 5.88 | 0.76   | 10.71 | -180.2 | 0.17   | 33.52 | 7  | 9  |
| 66 | BoB05 (1999) | 1.3759 | 7.08 | 2.24   | 15.79 | -172.5 | 0.12   | 53.64 | 5  | 6  |
| 67 | BoB06 (1999) | 1.2354 | 4.64 | 2.72   | 10.76 | -205.8 | 0.41   | 62.58 | 6  | 10 |
| 68 | BoB03 (2000) | 0.9835 | 3.22 | 1.56   | 10.83 | -333.4 | 0.25   | 15.64 | 5  | 8  |
| 69 | BoB04 (2000) | 1.7421 | 6.22 | 0.84   | 23.32 | -263.1 | 0.27   | 15.64 | 5  | 6  |
| 70 | BoB05 (2000) | 0.8599 | 9.12 | 1.81   | 16.39 | -199.7 | 0.23   | 29.05 | 5  | 7  |
| 71 | BoB06 (2000) | 0.9831 | 5.09 | 1.64   | 14.06 | -137.2 | 0.25   | 29.05 | 6  | 7  |
| 72 | BoB01 (2001) | 0.9093 | 4.29 | 1.48   | 11.98 | -147.2 | 0.19   | 15.64 | 4  | 8  |
| 73 | BoB03 (2002) | 0.7176 | 8.03 | 0.76   | 13.06 | -218.7 | 0.17   | 28.29 | 3  | 8  |
| 74 | BoB04 (2002) | 0.8554 | 2.83 | 1.43   | 10.59 | -236.4 | 0.23   | 20.11 | 6  | 12 |
| 75 | BoB05 (2002) | 0.3800 | 2.54 | 0.406  | 12.25 | -160.4 | 0.0758 | 18    | 5  | 7  |

|     |                 |        |      |       |       |        |       |       |   |    |
|-----|-----------------|--------|------|-------|-------|--------|-------|-------|---|----|
| 76  | BoB07 (2003)    | 1.2533 | 4.81 | 1.16  | 14.68 | -281   | 0.27  | 22.35 | 6 | 7  |
| 77  | Baaz (2005)     | 1.7199 | 2.71 | 1.62  | 12.14 | -138.7 | 0.15  | 20.11 | 5 | 9  |
| 78  | Fanoos (2005)   | 0.9699 | 2.93 | 1.46  | 11.72 | -55.4  | 0.17  | 29.05 | 5 | 8  |
| 79  | Ogni (2006)     | 0.1900 | 3.74 | 0.931 | 9.794 | -71.85 | 0.073 | 28.29 | 2 | 3  |
| 80  | Sidr (2007)     | 1.4591 | 5.11 | 2.24  | 14.01 | -331.5 | 0.29  | 60.35 | 6 | 12 |
| 81  | Rashmi (2008)   | 1.165  | 5.38 | 1.05  | 10.63 | -219.1 | 0.23  | 20.11 | 3 | 7  |
| 82  | Khaimukh (2008) | 0.2903 | 4.07 | 1.24  | 22.95 | -197.9 | 0.27  | 20.11 | 4 | 8  |
| 83  | Nisha (2008)    | 1.1039 | 4.79 | 1.86  | 21.51 | -204.3 | 0.36  | 22.35 | 5 | 9  |
| 84  | Ward (2009)     | 0.897  | 2.38 | 0.27  | 18.39 | -188.7 | 0.19  | 20.11 | 7 | 8  |
| 85  | Giri (2010)     | 0.821  | 6.69 | 1.29  | 10.59 | -66.37 | 0.12  | 60.35 | 4 | 5  |
| 86  | Jal (2010)      | 1.0937 | 7.69 | 2     | 10.6  | -197.5 | 0.31  | 21.29 | 8 | 7  |
| 87  | Thane (2011)    | 1.4581 | 4.93 | 2.59  | 24.88 | -313.1 | 0.54  | 35.76 | 7 | 9  |
| 88  | Nilam (2012)    | 0.442  | 6.13 | 1.56  | 10.89 | -281.9 | 0.39  | 24.58 | 3 | 10 |
| 89  | Phailin (2013)  | 2.2577 | 5.39 | 2.71  | 10.53 | -241.4 | 0.6   | 62.59 | 4 | 12 |
| 90  | Helen (2013)    | 0.5009 | 5.61 | 2.77  | 18.28 | -183.9 | 0.19  | 26.82 | 4 | 8  |
| 91  | Lehar (2013)    | 0.6713 | 4.86 | 1.57  | 15.61 | -264.2 | 0.18  | 33.52 | 6 | 12 |
| 92  | Madi (2013)     | 2.5778 | 5.15 | 1.83  | 28.73 | -245.7 | 0.71  | 31.29 | 7 | 15 |
| 93  | Hudhud (2014)   | 2.9978 | 3.09 | 4.24  | 11.65 | -237.8 | 0.72  | 51.4  | 5 | 12 |
| 94  | Kyant (2016)    | 0.43   | 4.09 | 1.522 | 10.61 | 37.02  | 0.177 | 20.57 | 8 | 10 |
| 95  | Nada (2016)     | 0.7012 | 4.77 | 1.18  | 17.38 | -207.1 | 0.35  | 20.11 | 3 | 7  |
| 96  | Vardah (2016)   | 1.4837 | 4.39 | 2.16  | 20.25 | -292.5 | 0.48  | 33.52 | 6 | 9  |
| 97  | Titli (2018)    | 3.2836 | 3.45 | 1.953 | 10.56 | -327.8 | 0.26  | 42.46 | 6 | 9  |
| 98  | Gaja (2018)     | 1.1598 | 3.49 | 0.75  | 24.34 | -126.2 | 0.18  | 33.52 | 9 | 6  |
| 99  | Phethai (2018)  | 0.7272 | 5.98 | 1.575 | 29.45 | -206.8 | 0.53  | 24.58 | 6 | 7  |
| 100 | Bulbul (2019)   | 2.64   | 3.21 | 2.679 | 11.67 | -      | -     | 38.88 | 6 | 8  |
| 101 | Nivar (2020)    | 1.56   | 4.04 | 3.459 | 15.1  | -      | -     | 36    | 6 | 6  |
| 102 | Burevi (2020)   | 0.9699 | 4.71 | 1.272 | 13.18 | -      | -     | 23.14 | 6 | 7  |

**Table S4:** Locations of various buoy used in this study.

| <b>Cyclone</b> | <b>Buoy ID</b>     | <b>Location of the Buoy</b> |
|----------------|--------------------|-----------------------------|
| Aila           | RAMA BUOY, 15N 90E | 15N 90E                     |
| Bijli          | RAMA BUOY, 15N 90E | 15N 90E                     |
| Maarutha       | RAMA BUOY, 15N 90E | 15N 90E                     |
| Mora           | RAMA BUOY, 15N 90E | 15N 90E                     |
| Jal            | NIOT BUOY BD14     | 08°00'33" E<br>85°31'18" N  |
| Phailin        | NIOT BUOY BD10     | 16°30'12" E<br>88°00'00" N  |
| Hudhud         | NIOT BUOY BD10     | 16°30'18" E<br>87°57'57" N  |
| Vardah         | NIOT BUOY BD13     | 13°59'56" E<br>86°59'53" N  |

In this study we used the National Institute of Ocean Technology moored buoy system and Research Moored Array for African-Asian-Australian Monsoon Analysis and Prediction (RAMA) for analyzing the depth wise variation of temperature and for the calculation of Mixed Layer Depth (MLD), isothermal layer depth (ILD) and BLT (supplementary figure). The MLD denotes the depth at which the density is 0.125 kg/m<sup>3</sup> greater than value at 10 m (e.g. Rao & Sivakumar, 2003) and ILD represents the depth at which the temperature is 0.5°C lower than that at 10 m. This definition is in accordance with that of MLD such that when there is no salinity variation then the MLD and ILD are inseparable. The positive difference between ILD and MLD is the BLT. The MLD was at its peak during both southwest and northeast monsoon. The minimum MLD is observed in April and May (Vissa et al., 2013).

The buoy data from NIOT were not available for the pre – monsoon cyclones and hence we have used the RAMA buoy data for the analysis. The MLD and BLT has been calculated for pre (five days before the cyclone) and post cyclone period (five days after the cyclone) to understand the influence of tropical cyclones on surface and subsurface parameters. For the pre – monsoon cyclones, the difference between pre- and post-cyclone MLD is highest and was about ~ 29 m for the Cyclone Aila, as seen from Table S2. However, the MLD was very less for the case of Maarutha in the post-cyclone period. The absence of barrier layer during pre – monsoon season was clearly evident in the case of cyclone Aila and Bijli.

The NIOT buoy data were available for cyclones Jal, Phailin, Hudhud and Vardah, and hence was used for the calculation for MLD and BLT for pre- and post-cyclones period as mentioned above.

The post-cyclone MLD was higher for the case of cyclone Jal and was about ~ 19 m and for cyclone Hudhud it was about ~ 5 m. The cyclone Phailin exhibited smaller MLD after the passage and MLD reduced to 18 m in the post-cyclone period from 31 m during the pre-cyclone period. The smaller MLD after the cyclone passage was also observed for Vardah, although it was not a huge difference when compared with cyclone Phailin. Among the four cyclones, cyclone Jal and Vardah occurred over the southwest bay where as the stronger cyclones Hudhud and Phailin occurred over the northern bay.

**Table S5.** The estimated MLD and BLT for selected cyclones. Red indicates pre–monsoon cyclones and Green indicates post–monsoon cyclones

| SI No | Cyclone  | MLD   |       | BLT   |       |
|-------|----------|-------|-------|-------|-------|
|       |          |       |       |       |       |
| 1     | Aila     | 12.94 | 42.6  | 14.19 | 4.88  |
| 2     | Bijli    | 9.38  | 21.72 | 6.55  | 4.87  |
| 3     | Maarutha | 4.96  | 6.10  | 15.07 | 42.91 |
| 4     | Mora     | 5.56  | -     | 21.1  | -     |
| 5     | Jal      | 28.45 | 47.68 | 10.94 | 5.26  |
| 6     | Phailin  | 31.21 | 18.05 | 19.66 | 7.26  |
| 7     | Hudhud   | 30.65 | 8.35  | 35.02 | 7.94  |
| 8     | Vardah   | 42.43 | 41.71 | 29.42 | 27.36 |

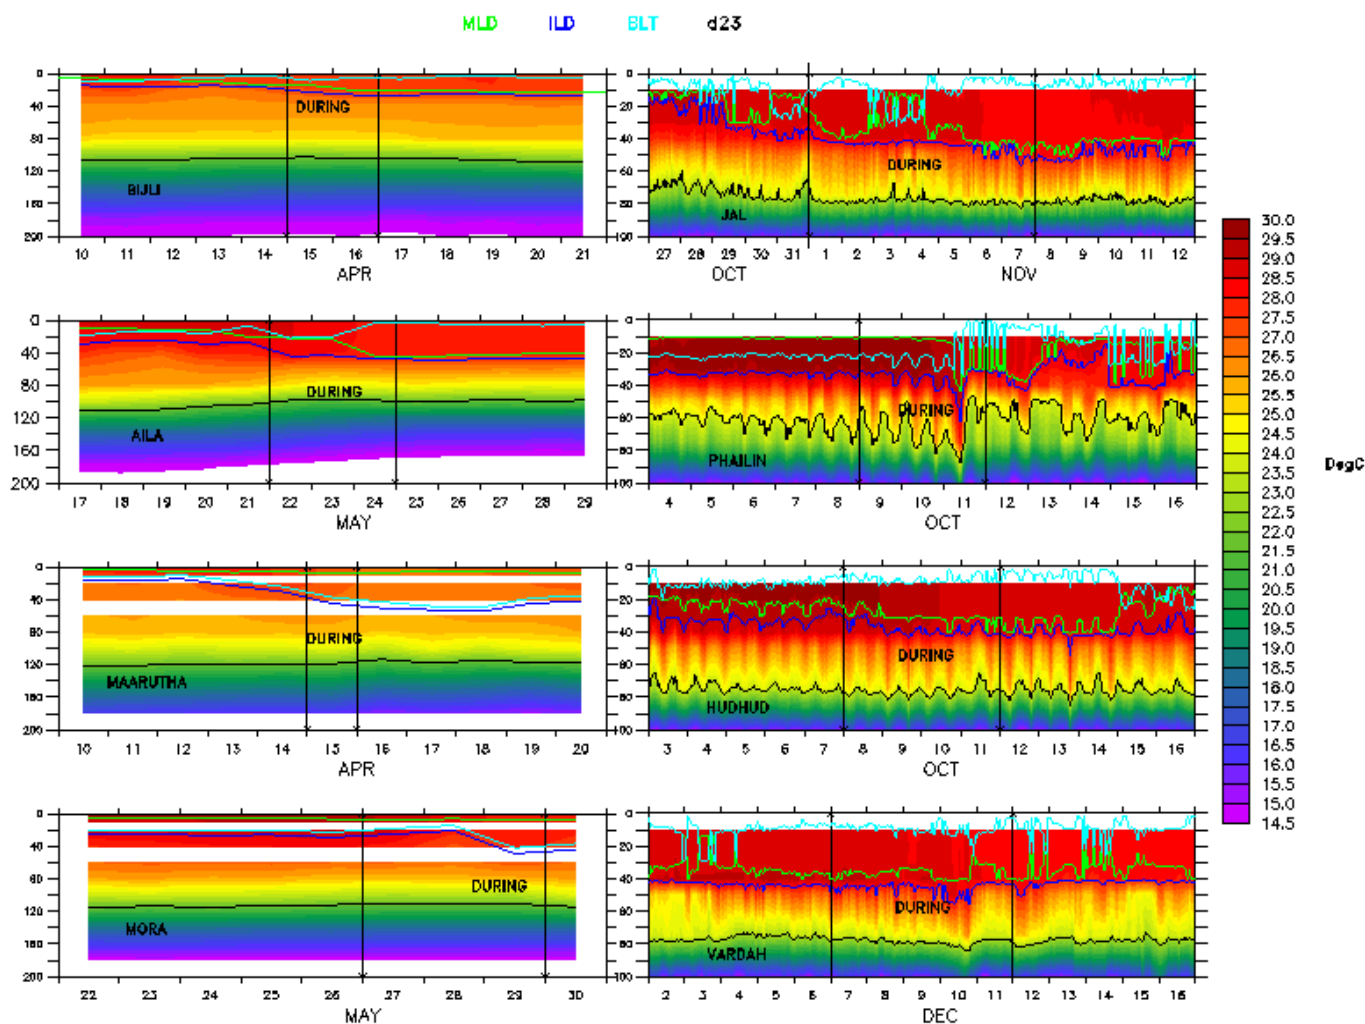

**Figure S1:** The MLD , BLT, ILD and D23 of some selected cyclones during Pre (left) –and Post (right) –Monsoon season. The vertical black lines indicate the cyclone period.

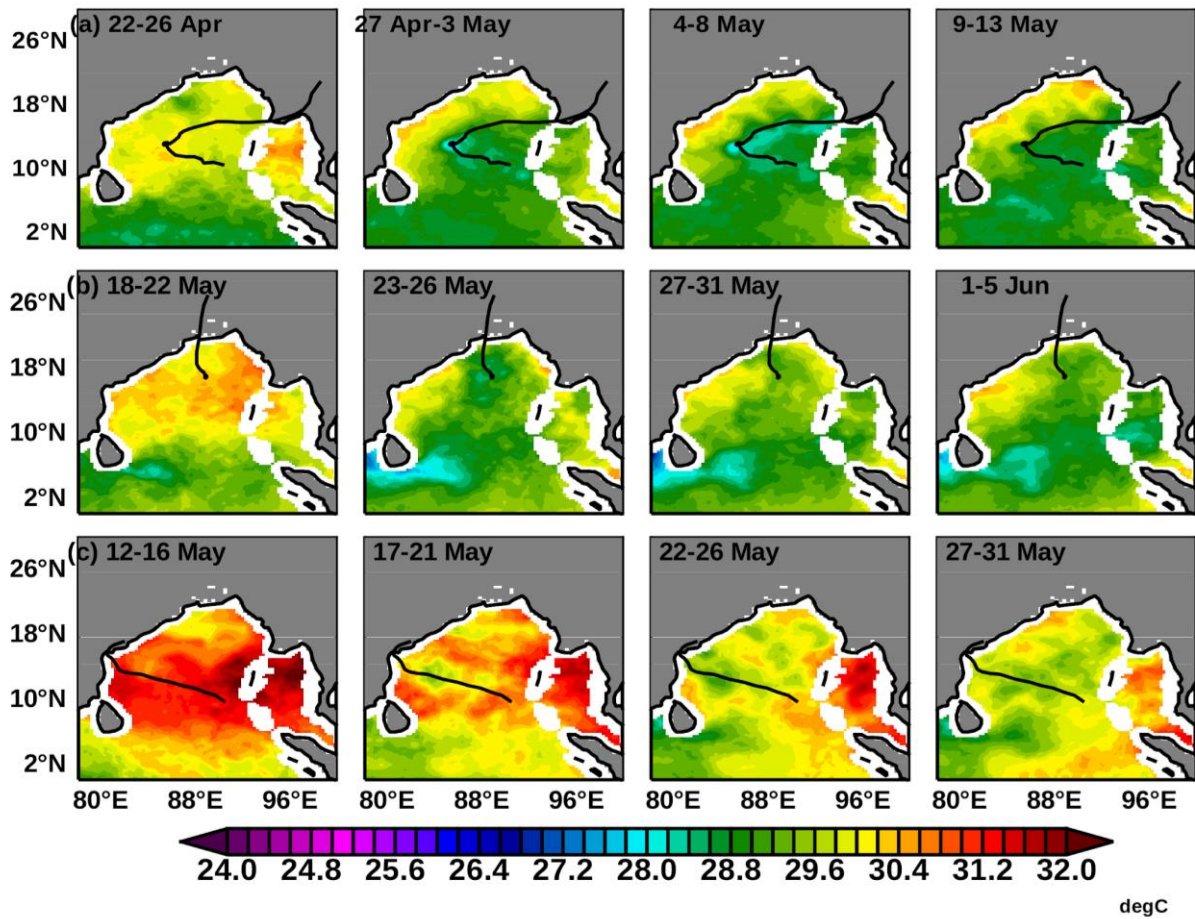

**Figure S2: Evolution of SST during the cyclone passage.** SST averaged for five days before the cyclone, during the entire cyclone period, five days just after the cyclone and the next five days using microwave OISST data for (a) Nargis (2008), (b) Aila (2009) and (c) Laila (2010). The tracks of the cyclone are also shown in their respective plots.



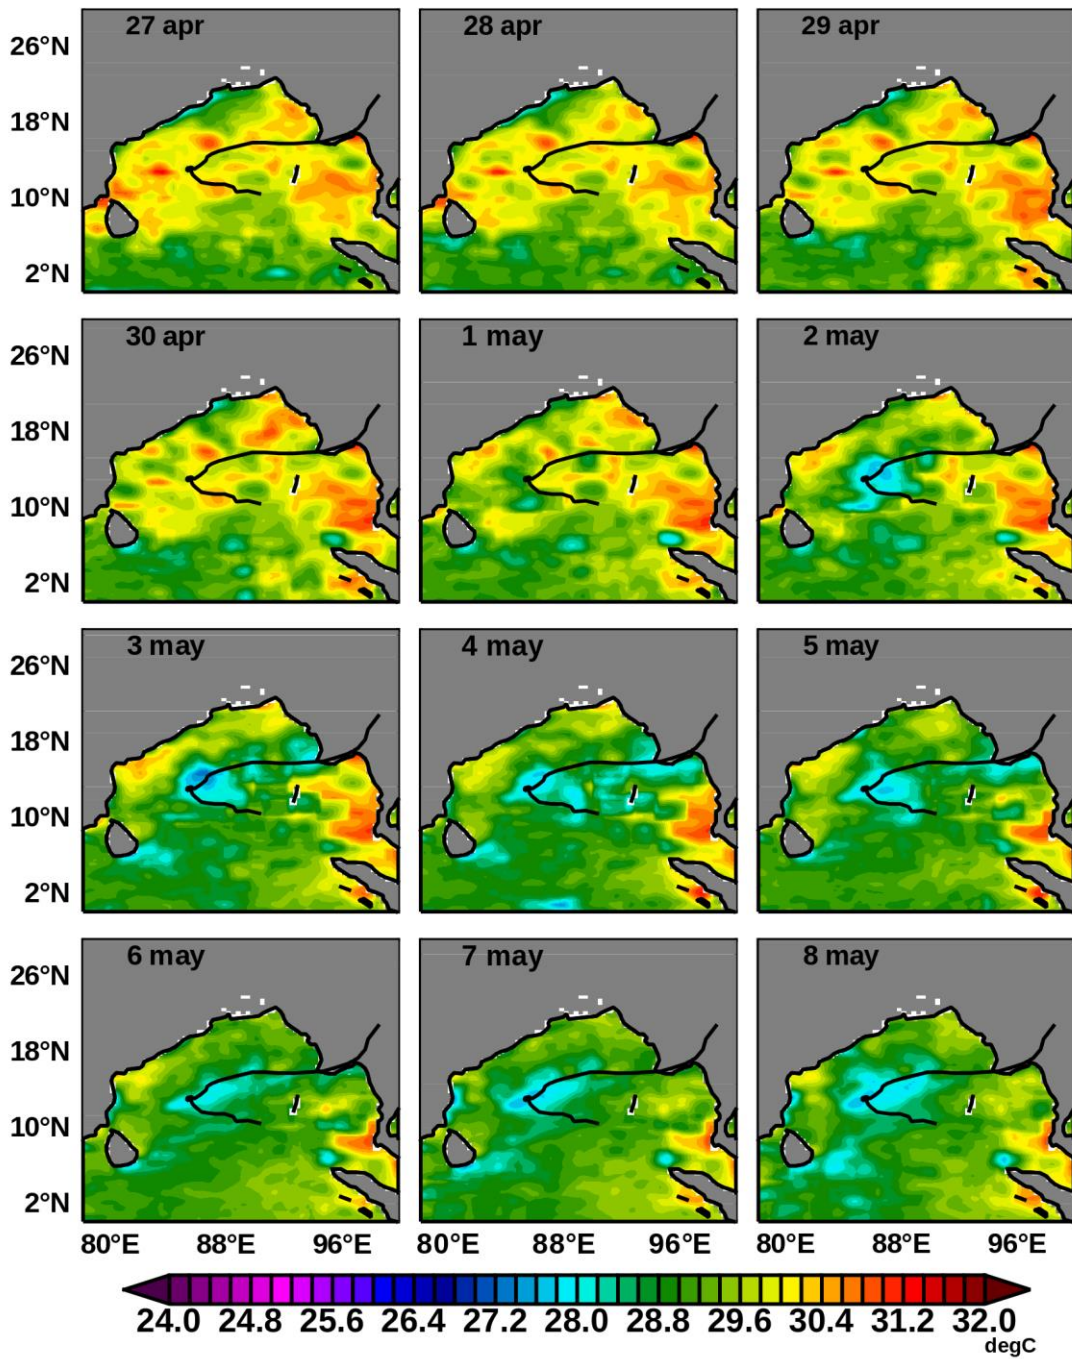

Figure S3: The daily SST for the cyclone Nargis (2008) from 27 April to 8 May using AVHRR data



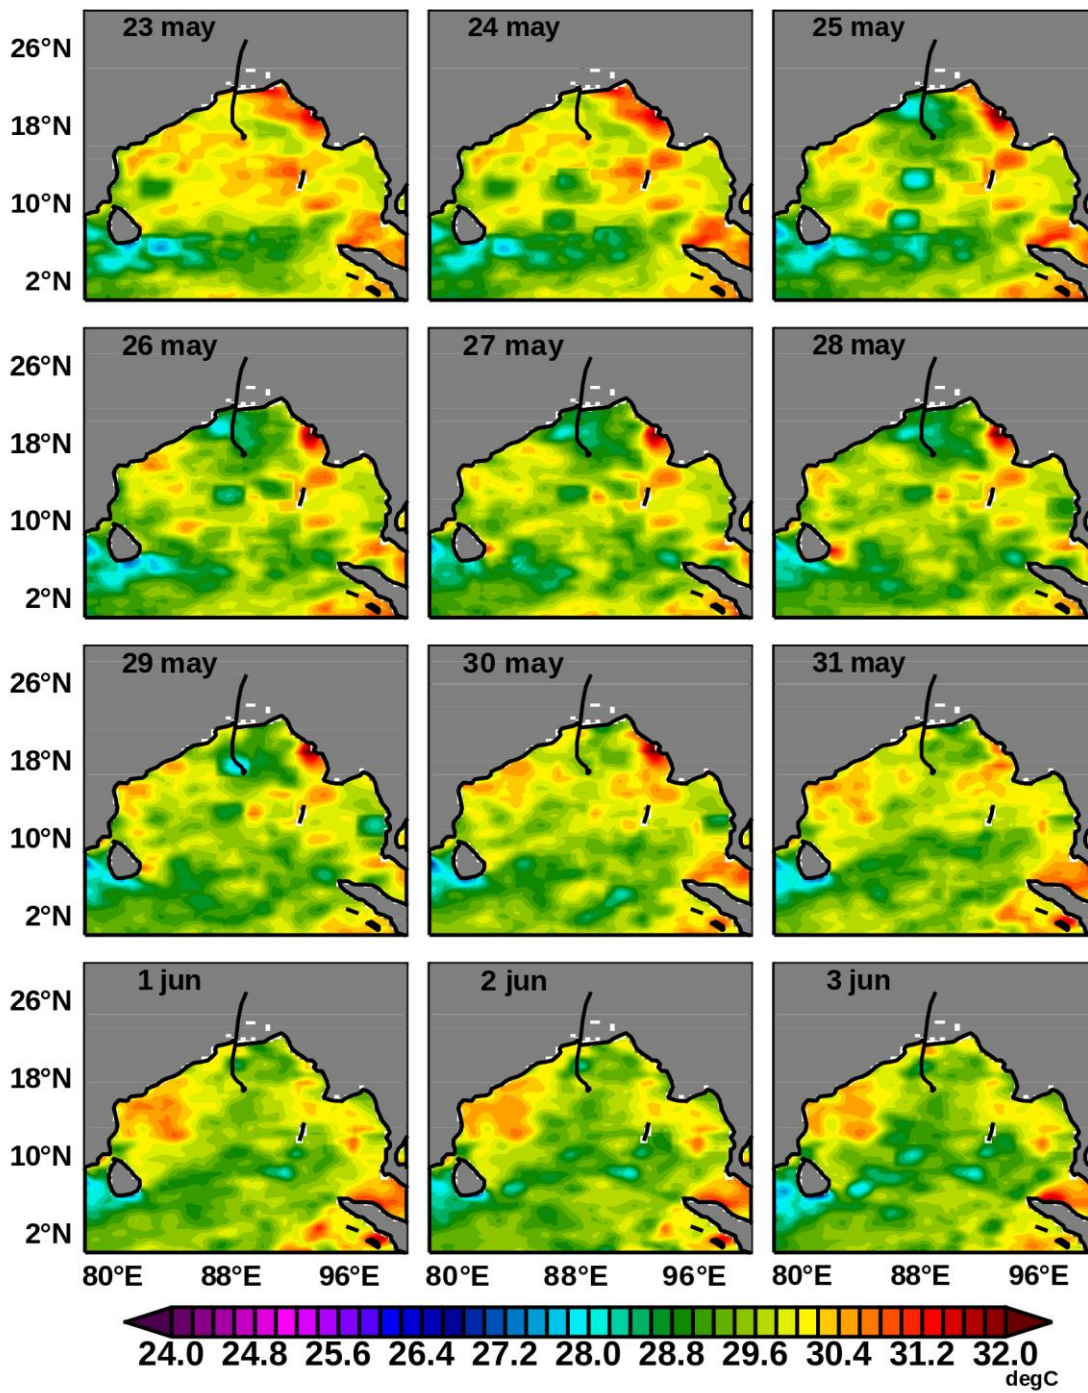

Figure S4: The daily SST for the cyclone Aila (2009) from 23 May to 26 May using AVHRR data

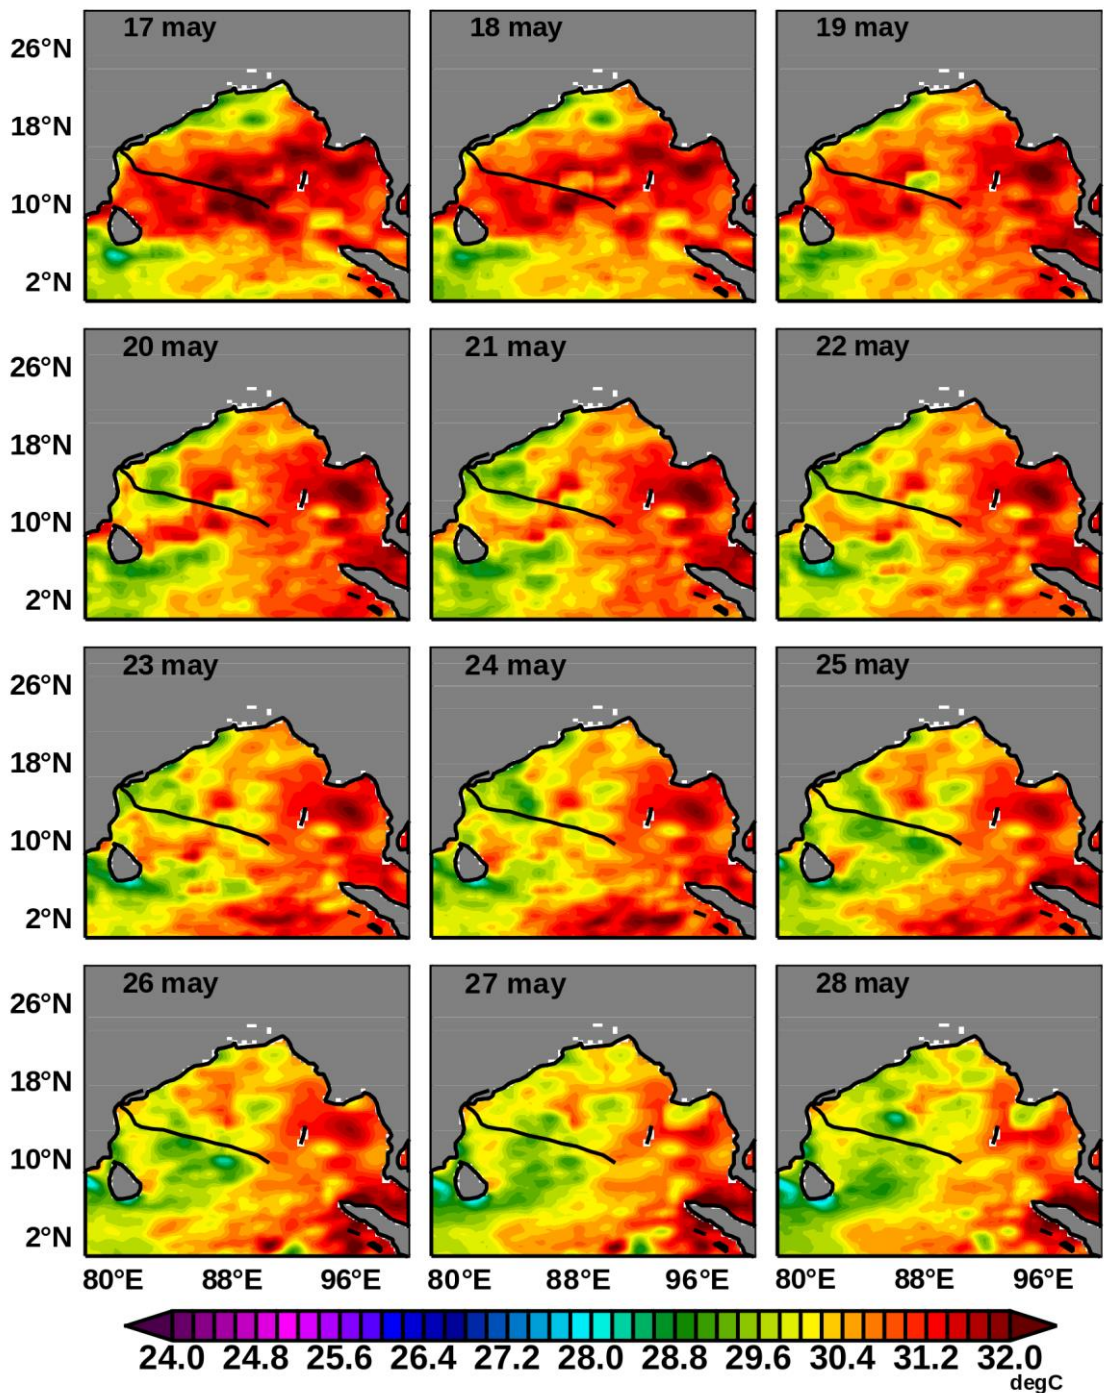

Figure S5: The daily SST for the cyclone Laila (2010) from 17 May to 21 May using AVHRR data

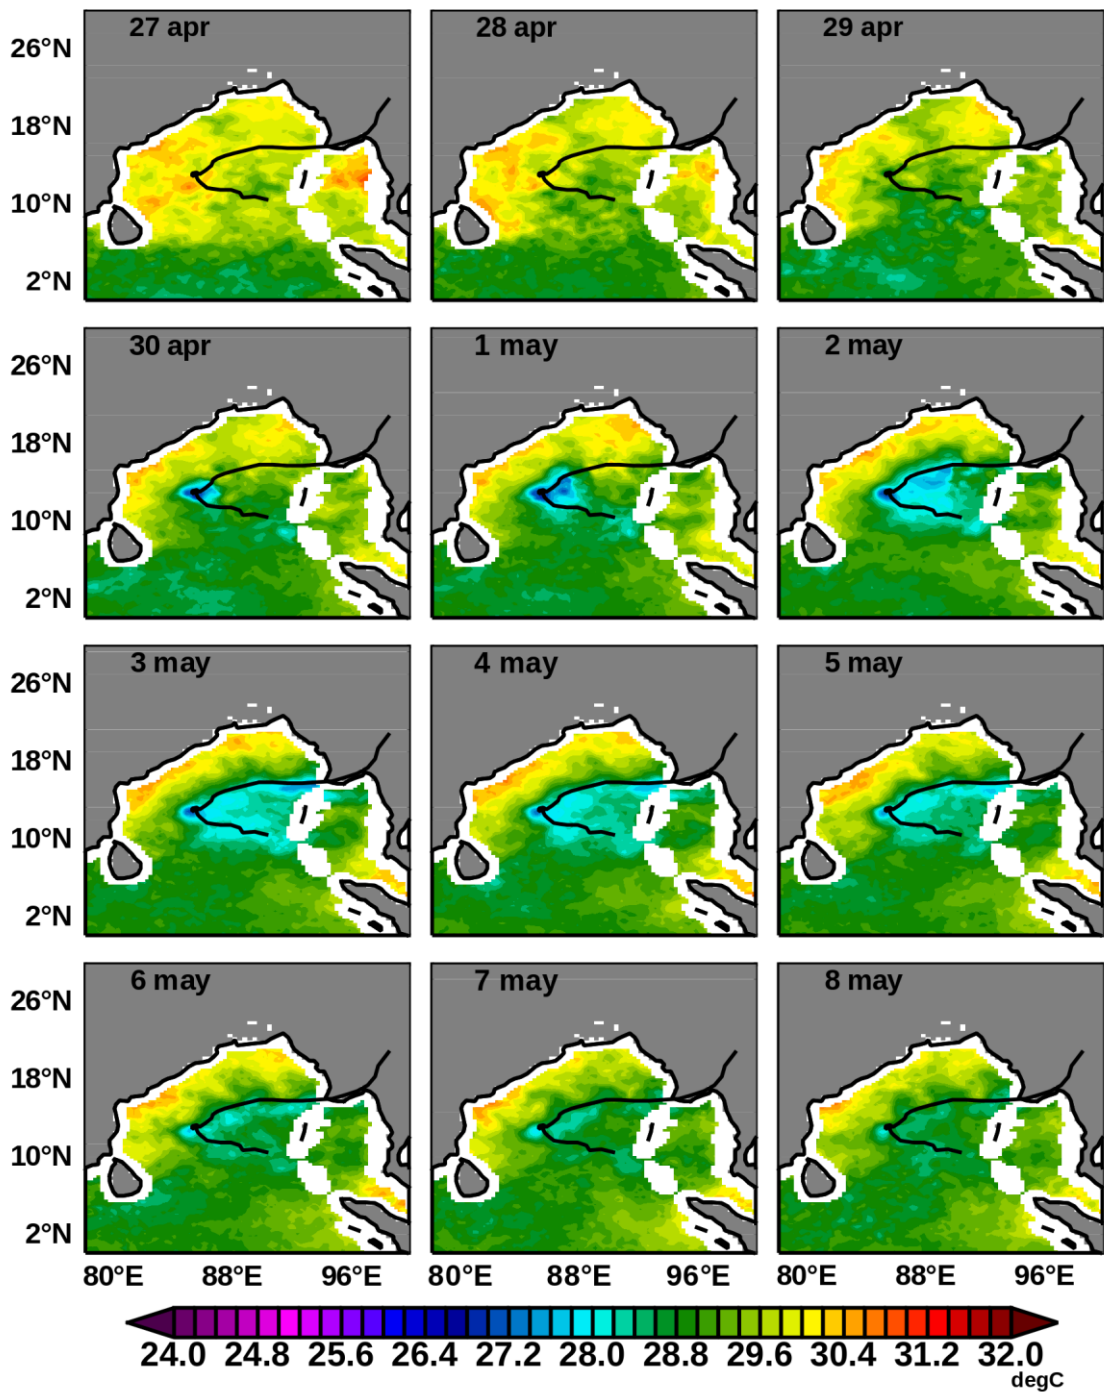

Figure S6: The daily SST for the cyclone Nargis (2008) from 27 April to 8 May using OISST data



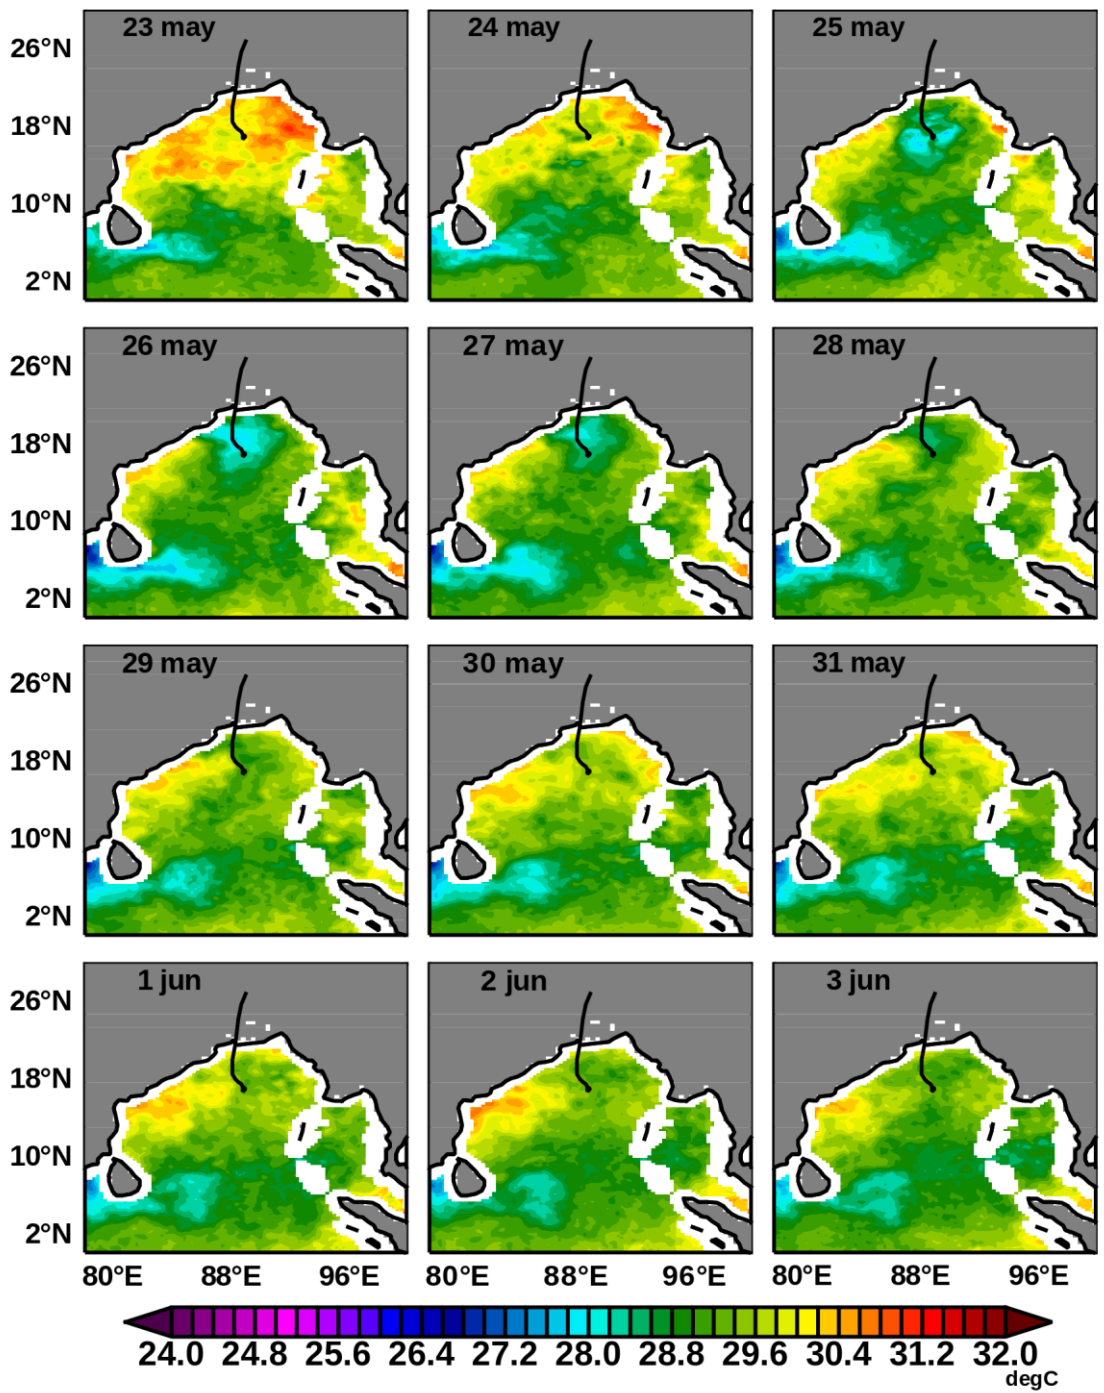

Figure S7: The daily SST for the cyclone Aila (2009) from 23 May to 26 May using OISST data

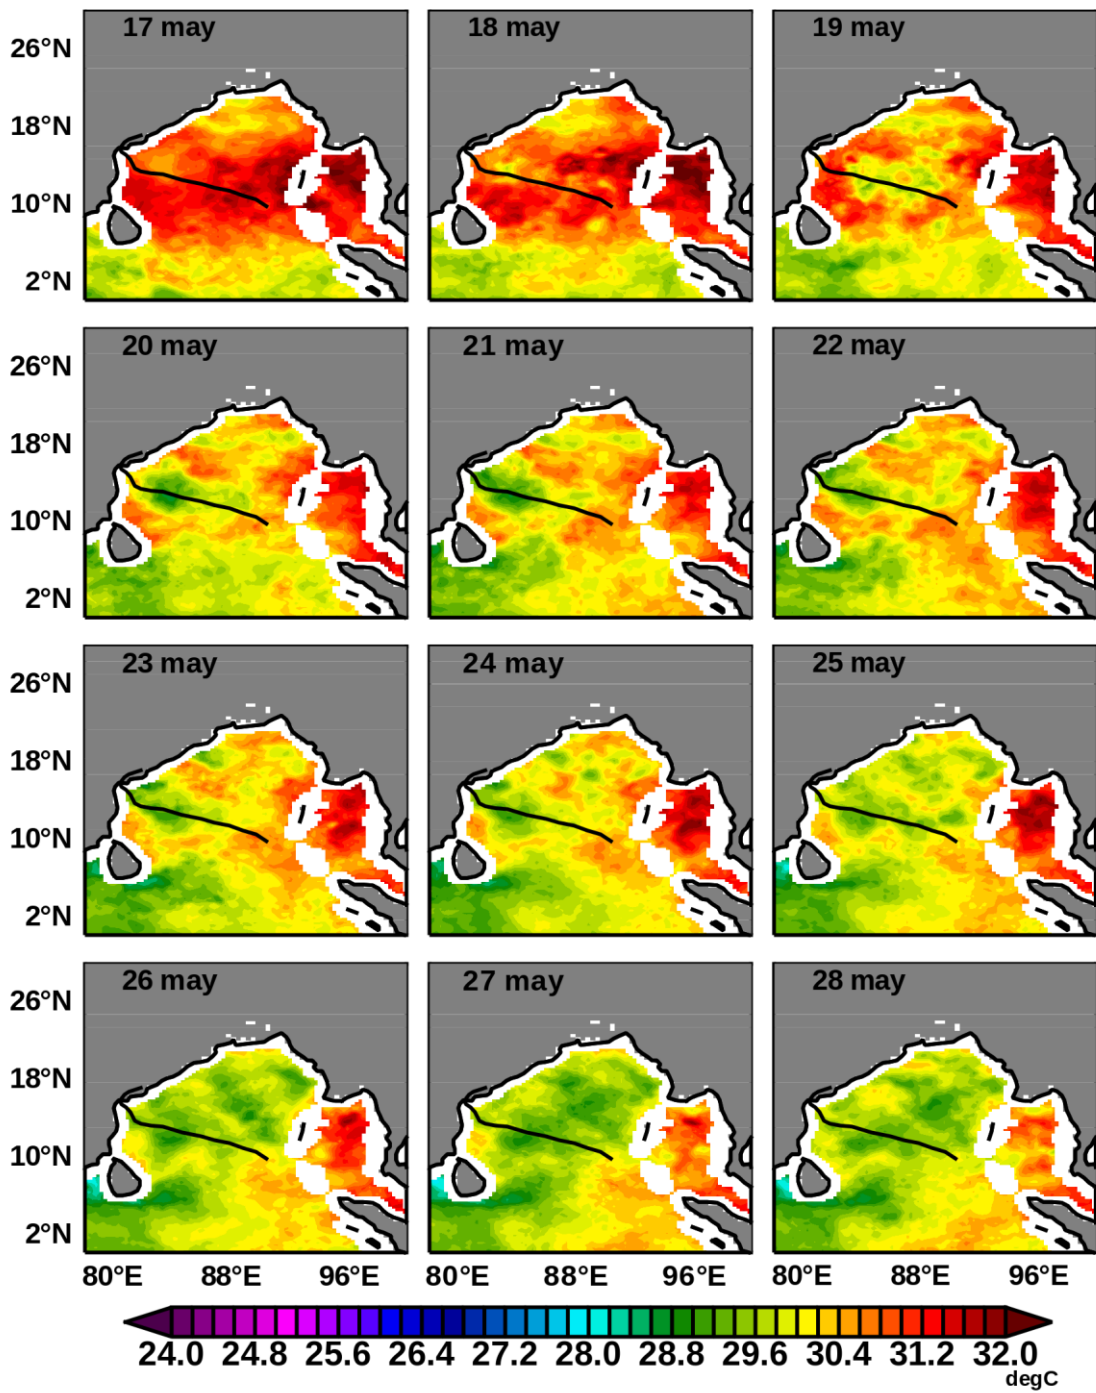

Figure S8: The daily SST for the cyclone Laila (2010) from 17 May to 21 May using OISST data
